## **Alternative analysis of mpox vaccine effectiveness data from Israel**

Christopher B. Boyer, PhD\* and Marc Lipsitch, DPhil  
Center for Communicable Disease Dynamics,  
Harvard T.H. Chan School of Public Health,  
677 Huntington Avenue, Boston, MA 02115 USA

\*corresponding author

The authors have withdrawn their manuscript owing to a missing understanding about the nature of the time-dependent analysis conducted by Wolff Sagy et al. Specifically, in an exchange the authors clarified that they did not reset the time variable in their analysis of person-time among the vaccinated, but split the observation at the time of vaccination and introduced a time-dependent indicator of vaccination. The authors stand by the general point that observational studies of vaccination during an outbreak should be aware of the potential confounding effects of calendar time and immortal time bias. However, the authors do not wish this work to be cited as specific comment on the analysis of Wolff Sagy et al. If you have any questions, please contact the corresponding author.
